# Supplementary material
Source: publisher figshare collection journal article supplement (https://frontiersin.figshare.com/ndownloader/files/21227127)
Supplement: Supplementary file 1 [file 21227127]

## Sheet: Paleocurrent Data
Paleocurrent data		Table of Paleocurrent Data for Channel belt 1 - 4
CB 1					CB 2					CB 3					CB 4 - below LKC					CB 4 - Above LKC					KEY
1	LL	255	15		1	RL	136	25		1	RL	165	5		1	LL	262	15		1	RL	216	12		CB =	Channel belt
2	RL	22	15		2	LL	250	30		2	LL	294	9		2	LL	291	2		2	RL	198	16		LKC =	Lower kittanning Coal bed
3	LL	265	20		3	RL	113	19		3	LL	315	17		3	LL	132	2		3	LL	280	12
4	RL	53	18		4	RL	130	17		4	LL	323	10		4	RL	112	14		4	LL	256	17
5	LL	245	17		5	RL	107	8		5	LL	258	18		5	LL	282	26		5	RL	204	22
6	RL	35	20		6	RL	130	15		6	RL	124	10		6	LL	282	15		6	LL	273	18
7	LL	258	18		7	RL	145	15		7	LL	308	15		7	LL	295	8		7	RL	200	19
8	RL	85	14		8	RL	130	16		8	RL	140	30		8	RL	206	1		8	LL	253	18
9	LL	339	16		9	LL	250	15		9	RL	178	22		9	RL	249	25		9	RL	216	13
10	RL	22	28		10	LL	260	8		10	LL	295	8		10	LL	285	11		10	LL	245	25
11	LL	290	20		11	LL	232	14		11	RL	48	15		11	LL	278	22		11	RL	350	17
12	LL	265	18		12	LL	210	24		12	LL	320	6		12	RL	45	4		12	RL	180	23
13	LL	236	15		13	LL	320	12		13	RL	160	15		13	LL	226	11		13	LL	318	15
14	LL	245	28		14	RL	200	19		14	LL	272	11		14	RL	165	10		14	LL	308	18
15	LL	296	6		15	LL	324	12		15	RL	183	9		15	LL	356	10		15	RL	165	5
16	RL	18	10		16	RL	201	20		16	LL	280	14		16	RL	84	3		16	LL	294	9
17	RL	164	24		17	LL	256	11		17	RL	146	12		17	LL	320	20		17	LL	315	17
					18	RL	187	8		18	LL	272	11		18	RL	146	4		18	LL	323	10
					19	LL	330	6		19	RL	3	9							19	LL	258	18
					20	RL	199	13		20	LL	320	6							20	RL	124	10
					21	LL	250	30		21	RL	164	15
					22	RL	64	12		22	LL	272	12
					23	LL	280	24		23	RL	310	4
					24	RL	205	4		24	RL	50	18
					25	LL	288	16
					26	RL	205	8
					27	LL	250	13
					28	RL	132	4
					29	LL	60	15
					30	RL	188	15
					31	LL	284	21
					32	RL	158	9
					33	LL	277	12
					34	RL	146	12
					35	LL	295	15
					36	RL	216	20
					37	LL	298	9
